# Supplementary material for: Structure and anomalous underscreening in ethylammonium nitrate solutions confined between two mica surfaces
Source: Royal Society of Chemistry journal article supplement (doi:10.1039/d3fd00042g), 2023-01-01
Supplement: d3fd00042g1.pdf [file d3fd00042g1.pdf]

## Supporting Information

### *Structure and anomalous underscreening in ethylammonium nitrate solutions confined between two mica surfaces*

Catherine Fung and Susan Perkin\*

*Physical & Theoretical Chemistry Laboratory, University of Oxford, Oxford, UK.*

\* Correspondence: susan.perkin@chem.ox.ac.uk

Table 1 Parameters correspond to different volume fractions of EAN.

| EAN volume fraction | $n_i^b$ (ions/m <sup>3</sup> ) | $\epsilon_r$ | a (nm) | $\lambda_D$ (nm) | $\lambda_s$ (nm) | $\lambda_s/\lambda_D$ | a/ $\lambda_D$ |
|---------------------|--------------------------------|--------------|--------|------------------|------------------|-----------------------|----------------|
| 1                   | 6.73x10 <sup>27</sup>          | 26.2         | 0.42   | 0.07             | 7.6              | 5.7                   | 103.1          |
| 0.9                 | 5.96 x10 <sup>27</sup>         | 29.6         | 0.42   | 0.08             | 7.3              | 5.1                   | 87.7           |
| 0.8                 | 5.21 x10 <sup>27</sup>         | 33.4         | 0.43   | 0.09             | 7.1              | 4.5                   | 75.1           |
| 0.7                 | 4.48 x10 <sup>27</sup>         | 37.7         | 0.43   | 0.11             | 3.9              | 3.9                   | 36.0           |
| 0.1                 | 5.70 x10 <sup>27</sup>         | 71.7         | 0.44   | 0.42             | 0.8              | 1.1                   | 1.9            |

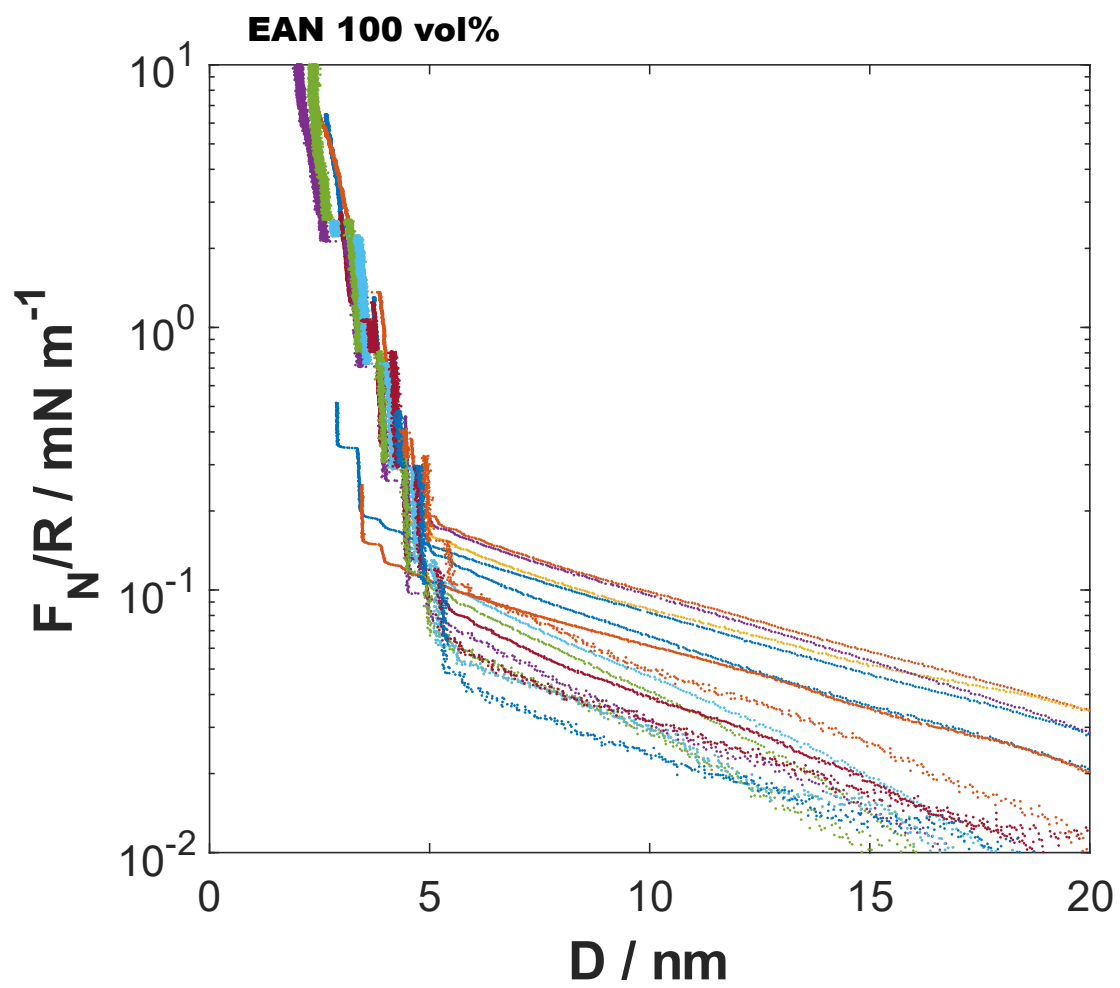

Figure S1 Force measurements across 100 vol% EAN between mica sheets. Force profiles obtained from 3 different experiments with different mica sheets.

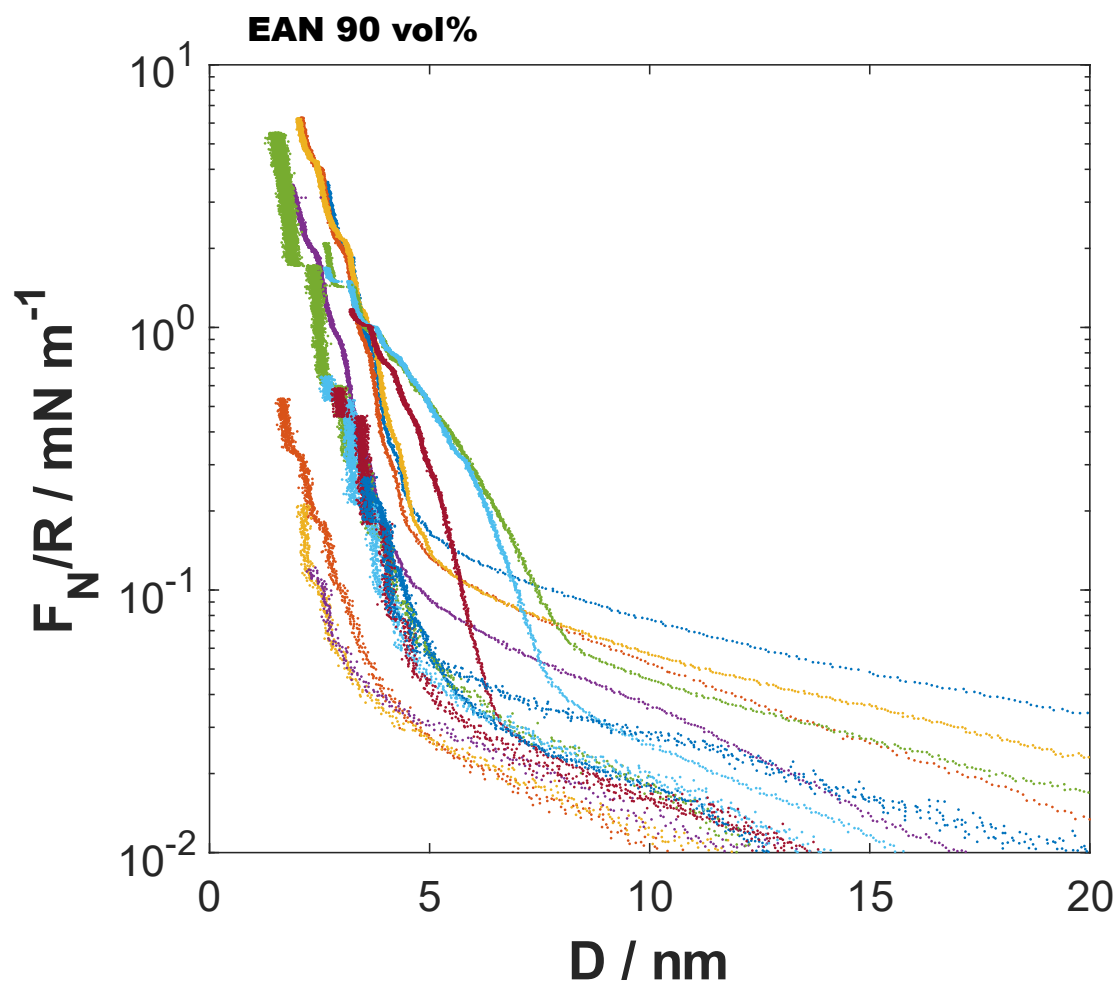

Figure S2 Force measurements across 90 vol% EAN between mica sheets. Force profiles obtained from 3 different experiments with different mica sheets.
